# Supplementary material for: Staphylococcus aureus enterotoxins induce FOXP3 in neoplastic T cells in Sézary syndrome
Source: PubMed Central journal article supplement (PMC7225173; doi:10.1038/s41408-020-0324-3), 2020-05-14
Supplement: 41408_2020_324_MOESM1_ESM.pdf [file 41408_2020_324_MOESM1_ESM.pdf]

## Supplementary figure S1

| Patient | Sex | Age, y | Diagnosis | ISCL classification | Percent CD4+ lymphocytes | CD4:CD8 ratio | ECP treatment |
|---------|-----|--------|-----------|---------------------|--------------------------|---------------|---------------|
| pt #1   | M   | na     | SS        | B2                  | 62%                      | 2,0           | ECP           |
| pt #2   | M   | na     | SS        | B2                  | 89%                      | 12,5          | ECP           |
| pt #3   | M   | 65     | SS        | B2                  | 82%                      | 14,2          | ECP           |
| pt #4   | M   | 69     | SS        | B2                  | 87%                      | 14,0          | ECP           |
| pt #5   | F   | na     | SS        | B2                  | na                       | na            | ECP           |
| pt #6   | M   | 67     | SS        | B2                  | 70%                      | 16,2          | ECP           |
| pt #7   | F   | na     | SS        | B2                  | 93%                      | 95,2          | ECP           |
| pt #8   | M   | 79     | SS        | B2                  | 90%                      | 56,6          | ECP           |
| pt #9   | M   | 76     | SS        | B2                  | 93%                      | 411,5         | ECP           |
| pt #10  | M   | 85     | SS        | B2                  | 31%                      | 0,5           | ECP           |
| pt #11  | M   | 74     | SS        | B2                  | 72%                      | 4,6           | ECP           |
| pt #12  | F   | 58     | SS        | B2                  | 85%                      | 27,3          | ECP           |

Patient characteristics. ECP, extracorporeal photopheresis; SS, Sézary syndrome; na, not available
